# Supplementary material for: Legacy landfill-derived microplastics in India: terrestrial matrix pathways, spatio-temporal dynamics, and environmental risks
Source: Royal Society of Chemistry journal article supplement (doi:10.1039/d5em00606f), 2026-01-01
Supplement: d5em00606f1.pdf [file d5em00606f1.pdf]

**Table S1: Overview of legacy waste remediation technologies and their implications for plastic and microplastic management**

| Technology                                  | Function                                                         | Recovered Materials                           | Limitations                                                                      | Microplastic Risk                                                            | References                                       |
|---------------------------------------------|------------------------------------------------------------------|-----------------------------------------------|----------------------------------------------------------------------------------|------------------------------------------------------------------------------|--------------------------------------------------|
| <b>Biomining (Mechanical Segregation)</b>   | Excavation + Trommel screening of legacy waste                   | Metals, RDF, recyclables, soil-like fines     | High heterogeneity; difficulty in separating multilayer and light plastics       | MPs remain embedded in <16 mm fines; lack of MP detection protocols          | CPCB, 2020; Kumar et al., 2022                   |
| <b>Refuse-Derived Fuel (RDF) Production</b> | Combustible waste sorted and processed into RDF for incineration | High-calorific plastics, textiles, paper      | Mixed feedstock lowers efficiency; low-quality RDF may include plastic fragments | Incomplete combustion may release airborne MPs; ash may contain residual MPs | Singh and Mondal, 2020                           |
| <b>Co-processing in Cement Kilns</b>        | High-temperature thermal treatment of non-recyclables            | Energy recovery from plastics                 | Requires strict feedstock control and emission monitoring                        | High-temperature destroys MPs; poorly operated kilns can emit nanoplastics   | Nanda and Berruti, 2021                          |
| <b>Recycling (Mechanical)</b>               | Segregated plastics are washed, shredded, and remanufactured     | Rigid plastics (HDPE, PP, PET)                | Cannot handle MLPs or contaminated film; informal sector dependent               | Reduces MP risk if clean input; unregulated operations may release MPs       | Joshi and Ahmed, 2016                            |
| <b>Compost Use of Soil-like Fines</b>       | Fines from trommeling used as landfill cover or road base        | Soil-like fines (30–50% of legacy waste mass) | Often contaminated with MPs and heavy metals; lacks quality standards            | High risk of MPs in soil and terrestrial ecosystems                          | Pardeshi and Dhodapkar, 2024; Meena et al., 2023 |
| <b>Landfilling of Residuals</b>             | Residual inert or unusable fractions are reburied                | Low-value mixed waste, rejects                | Re-burial undermines volume reduction goals                                      | Long-term fragmentation of buried plastics into MPs                          | Annepu, 2012; Kumar et al., 2017                 |

**Table S2-State-wise distribution of legacy waste dumpsites and remediation progress under SBM-U 2.0**

| State/UT | Total Dumpsites Identified | Sites Remediated | Legacy Waste Processed (Lakh) | Notable Comments |
|----------|----------------------------|------------------|-------------------------------|------------------|
|----------|----------------------------|------------------|-------------------------------|------------------|

| State/UT               | Total Dumpsites Identified | Sites Remediated | Legacy Waste Processed (Lakh) | Notable Comments                           |
|------------------------|----------------------------|------------------|-------------------------------|--------------------------------------------|
| Uttar Pradesh          | 611                        | 14               | 21.52                         | Highest number of identified dumpsites     |
| Madhya Pradesh         | 328                        | 53               | 8.73                          | Moderate remediation progress              |
| Maharashtra            | 327                        | 52               | 134.82                        | Highest volume of waste processed          |
| Tamil Nadu             | 250                        | 86               | 34.54                         | Strong progress across major ULBs          |
| Telangana*             | 82                         | 2                | 120.50                        | Large sites like Jawaharnagar remediated   |
| Delhi                  | 3                          | —                | —                             | Bio-mining initiated at Ghazipur & Bhalswa |
| Gujarat                | Not specified              | 12               | 10.99                         | Moderate progress                          |
| Haryana                | Not specified              | 22               | 25.27                         | Moderate progress                          |
| Rajasthan              | Not specified              | 8                | 0.61                          | Limited treatment coverage                 |
| Odisha                 | Not specified              | 2                | 2.03                          | Minimal progress                           |
| Punjab                 | Not specified              | 2                | 1.76                          | Minimal progress                           |
| Andhra Pradesh         | Not specified              | 2                | 8.52                          | Targeted regional efforts                  |
| Bihar                  | Not specified              | 1                | 0.05                          | Very limited action                        |
| Chhattisgarh           | Not specified              | 7                | 3.15                          | Regional progress in select cities         |
| Goa                    | Not specified              | 2                | 0.08                          | Small scale effort                         |
| Jammu & Kashmir        | Not specified              | 1                | 1.70                          | Recent remediation efforts                 |
| Jharkhand              | Not specified              | 1                | 0.35                          | Limited data available                     |
| Tripura                | Not specified              | 1                | 0.20                          | Early-stage treatment                      |
| <b>Total (approx.)</b> | <b>2,450+</b>              | <b>268</b>       | <b>~374.8</b>                 | As of 2023 under SBM-U 2.0                 |

**Source:** Ministry of Housing and Urban Affairs (MoHUA, 2023); Central Pollution Control Board (CPCB, 2022); Swachh Bharat Mission Toolkit (SBM-U 2.0); NITI Aayog & EU-REI (2022).

\* Telangana total estimated from multiple sources. † Totals are approximate due to data variation across sources.
